# Supplementary material
Source: PubMed Central journal article supplement (PMC30139)
Supplement: pnas_041452598_8.pdf [file pnas_041452598_8.pdf]

**Table 4.** Properties of purified proteins

|                                                     | S2                    |                       | S2loop                |                       |                       |
|-----------------------------------------------------|-----------------------|-----------------------|-----------------------|-----------------------|-----------------------|
|                                                     | WT                    | D187N                 | WT                    | D187N                 | D187Y                 |
| Experimental<br>$\epsilon$ , $M^{-1} \cdot cm^{-1}$ | 14,660                | 14,660                | 14,117                | 14,117                | 14,792                |
| Calculated<br>MM, Da                                | 13,243.0              | 13,243.0              | 14,781.7              | 14,780.7              | 14,829.8              |
| Electrospray<br>ionization<br>(ESI)-MS<br>MM, Da    | 13,241.9 $\pm$<br>2.0 | 13,239.2 $\pm$<br>0.6 | 14,783.7 $\pm$<br>1.7 | 14,777.8 $\pm$<br>0.9 | 14,826.9 $\pm$<br>2.5 |

MM, molecular mass.
