# Supplementary material
Source: PubMed Central journal article supplement (PMC30139)

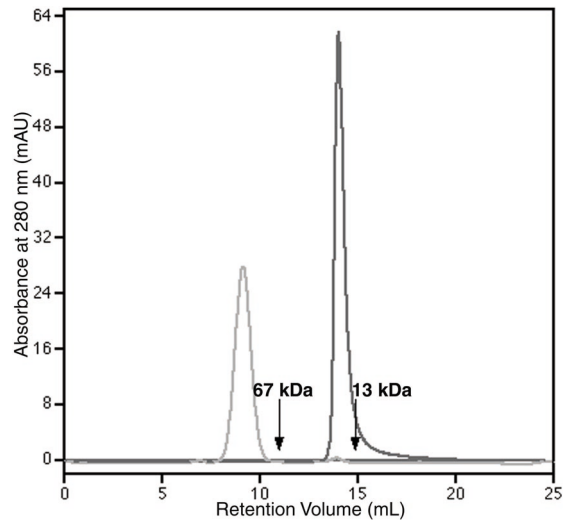

Supplement: pnas_041452598_3.pdf [file pnas_041452598_3.pdf]

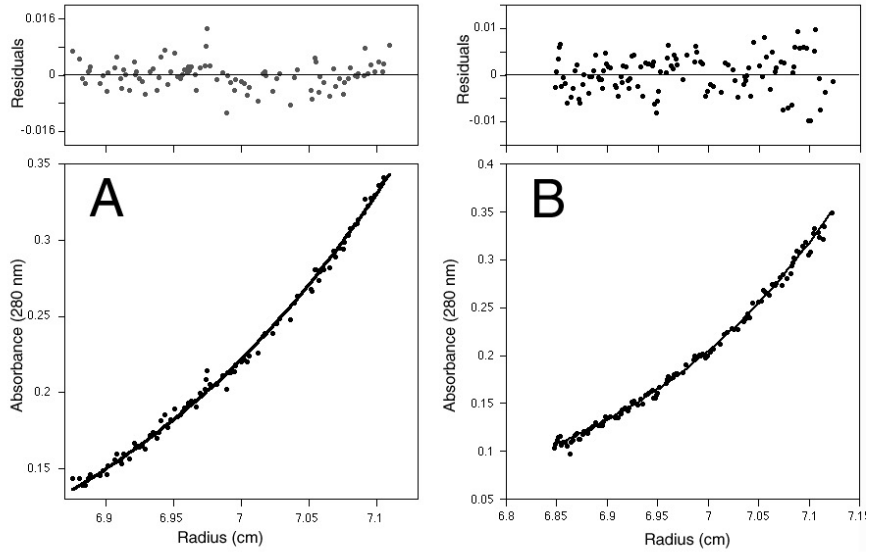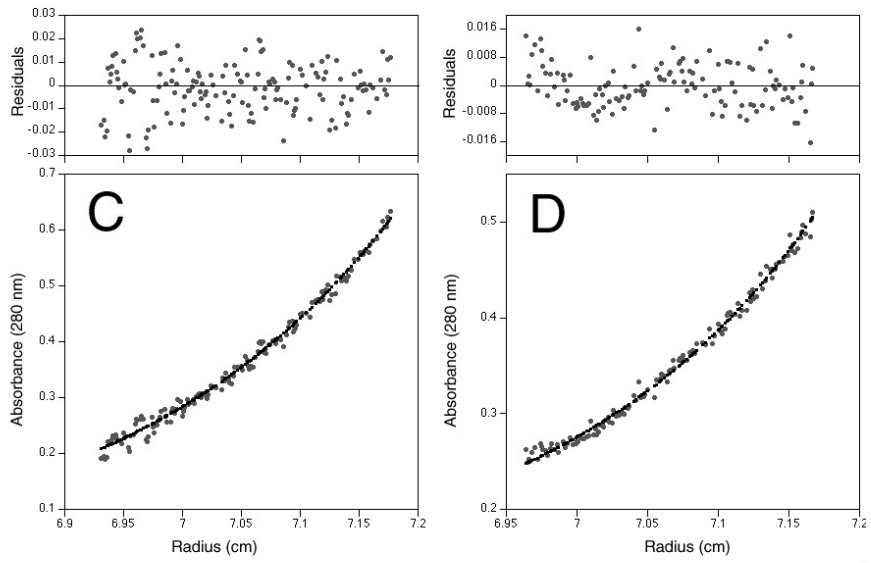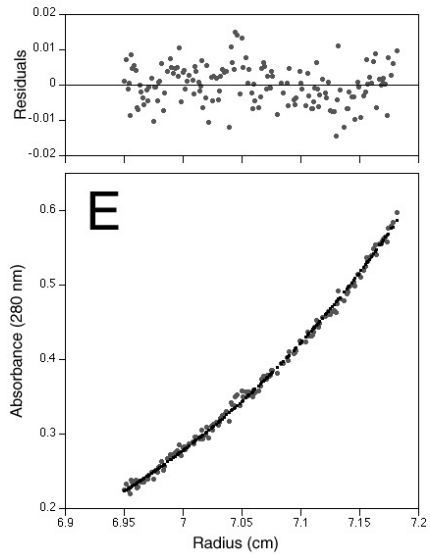

Supplement: pnas_041452598_5.pdf [file pnas_041452598_5.pdf]

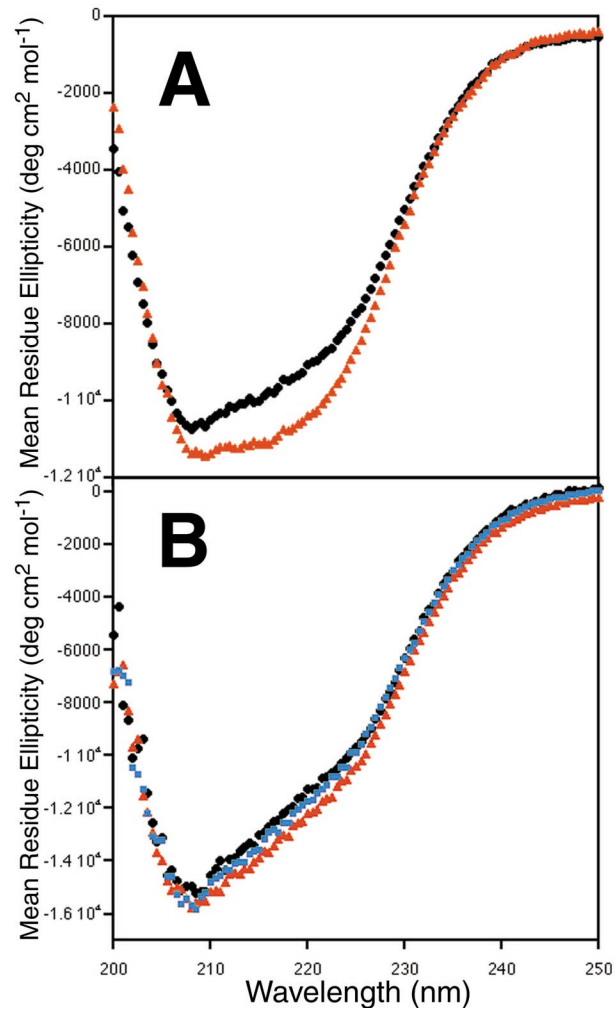

Supplement: pnas_041452598_7.pdf [file pnas_041452598_7.pdf]
